# Supplementary material for: Steam reforming of acetic acid over nickel/kapok-derived biochar: the effect of nickel exposure on the evolution of reaction intermediates and coke formation
Source: Royal Society of Chemistry journal article supplement (doi:10.1039/d3re00661a), 2024-01-01
Supplement: d3re00661a1.pdf [file d3re00661a1.pdf]

### Electronic Supplementary Information

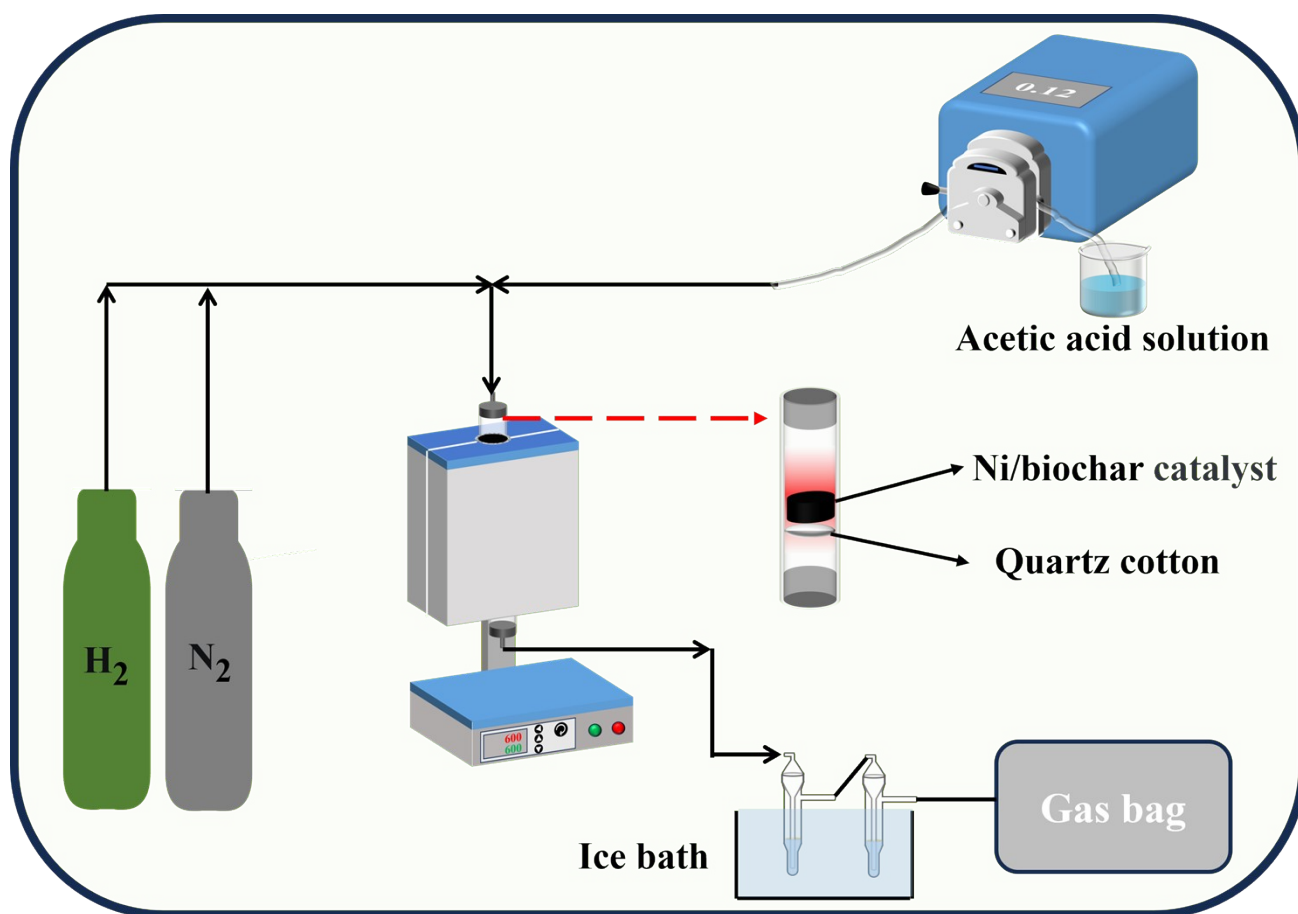

**Figure S1.** Schematic illustration of the acetic acid steam reforming.

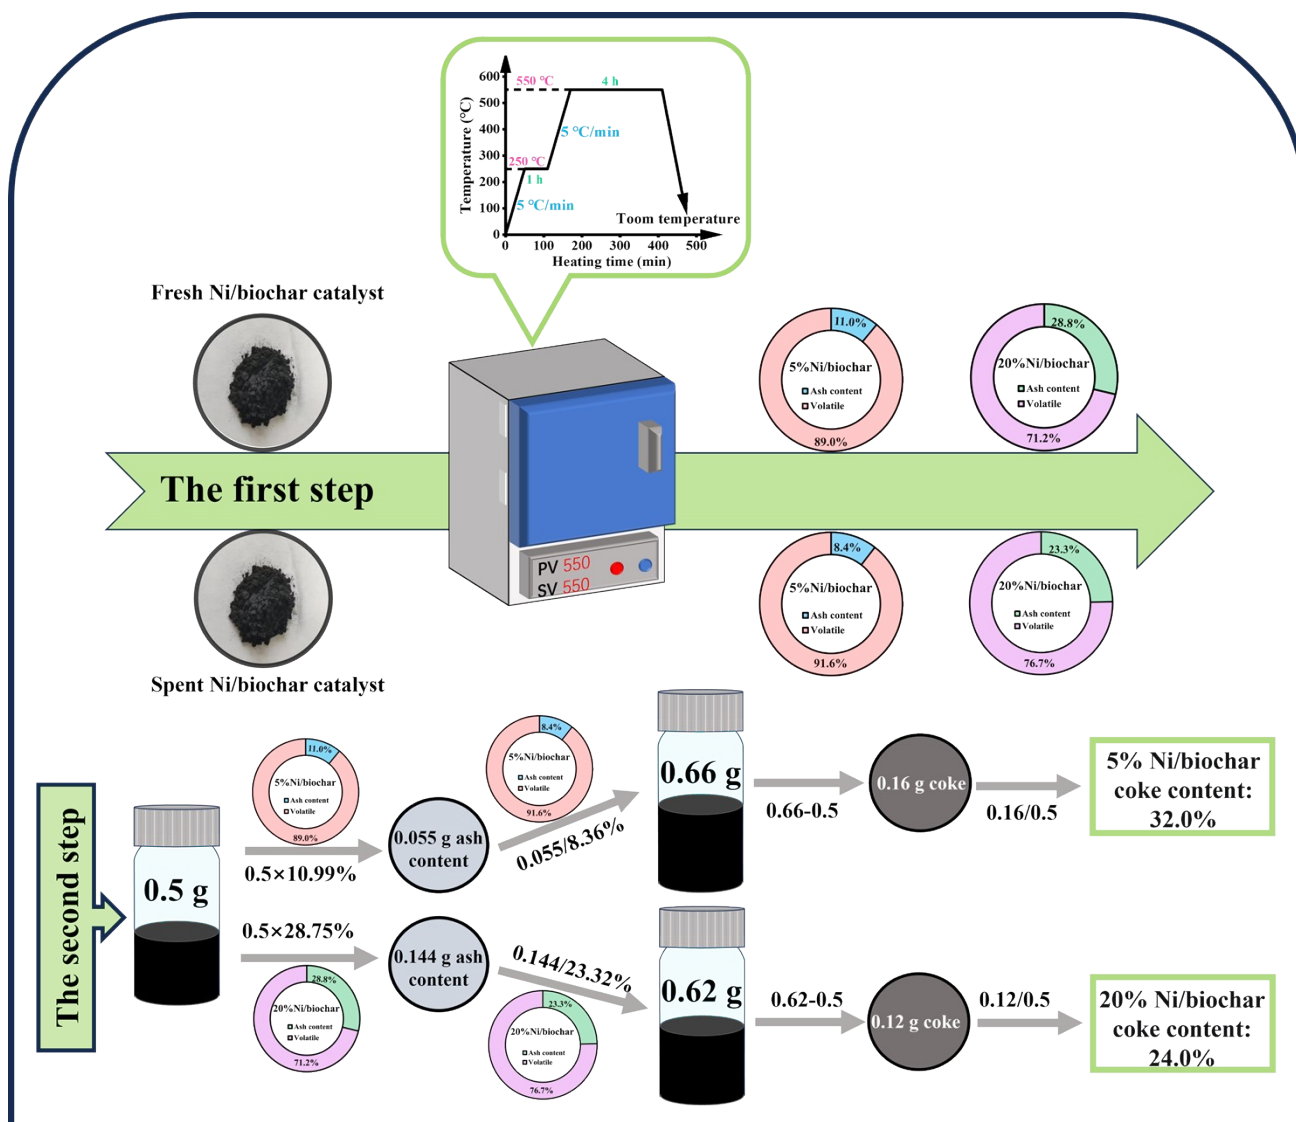

Figure S2. Method for calculating coke formed in the steam reforming.

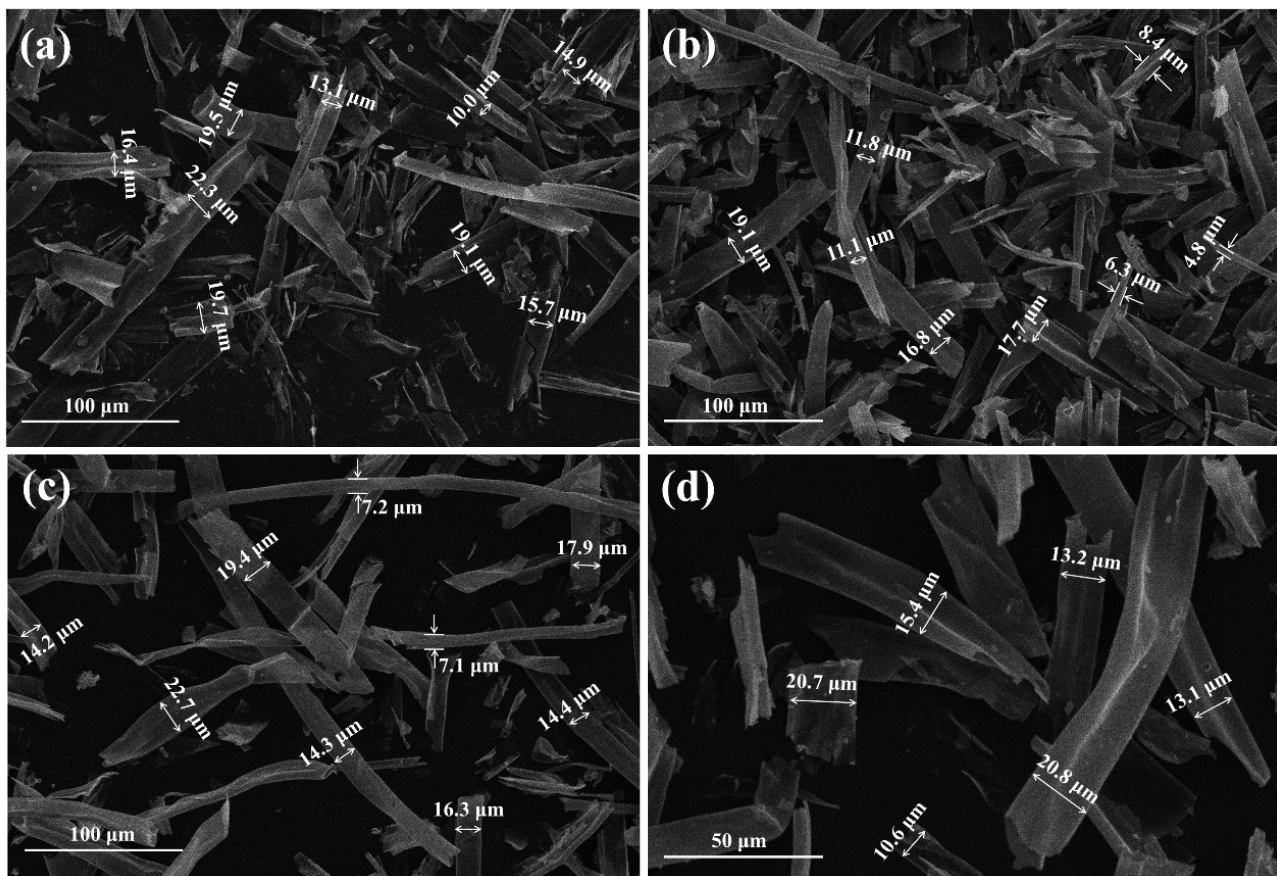

**Figure S3.** SEM images of Ni/biochar fibrous structures. (a-b): 5% Ni/biochar; (c-d): 20% Ni/biochar.

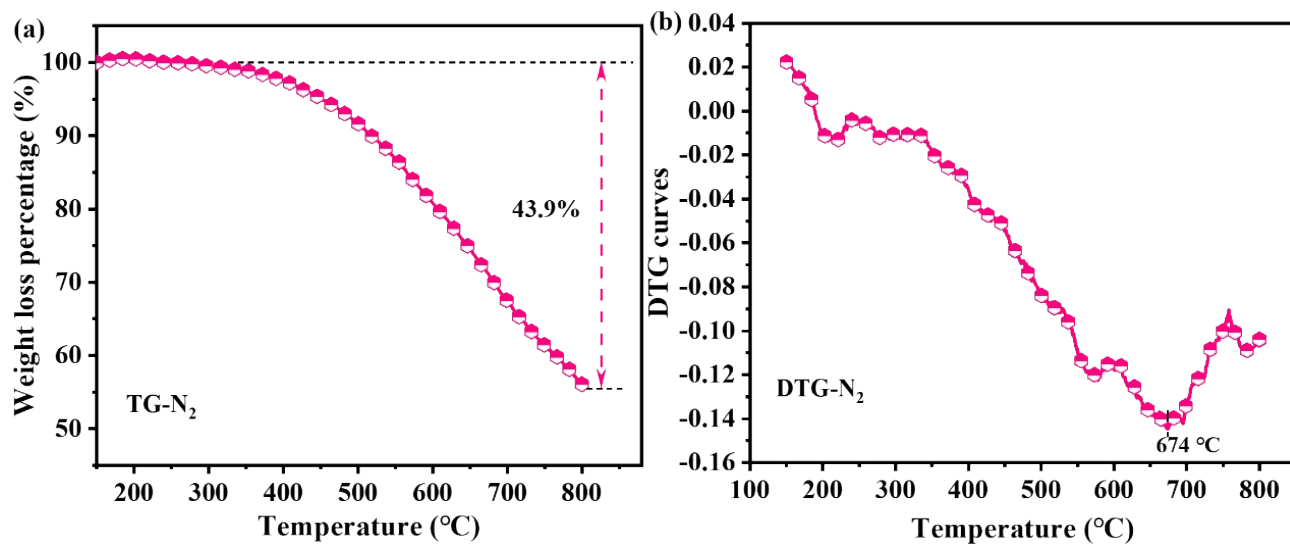

**Figure S4.** Thermostability of the kapok-derived biochar. (a) TG curves; (d) DTG curves.



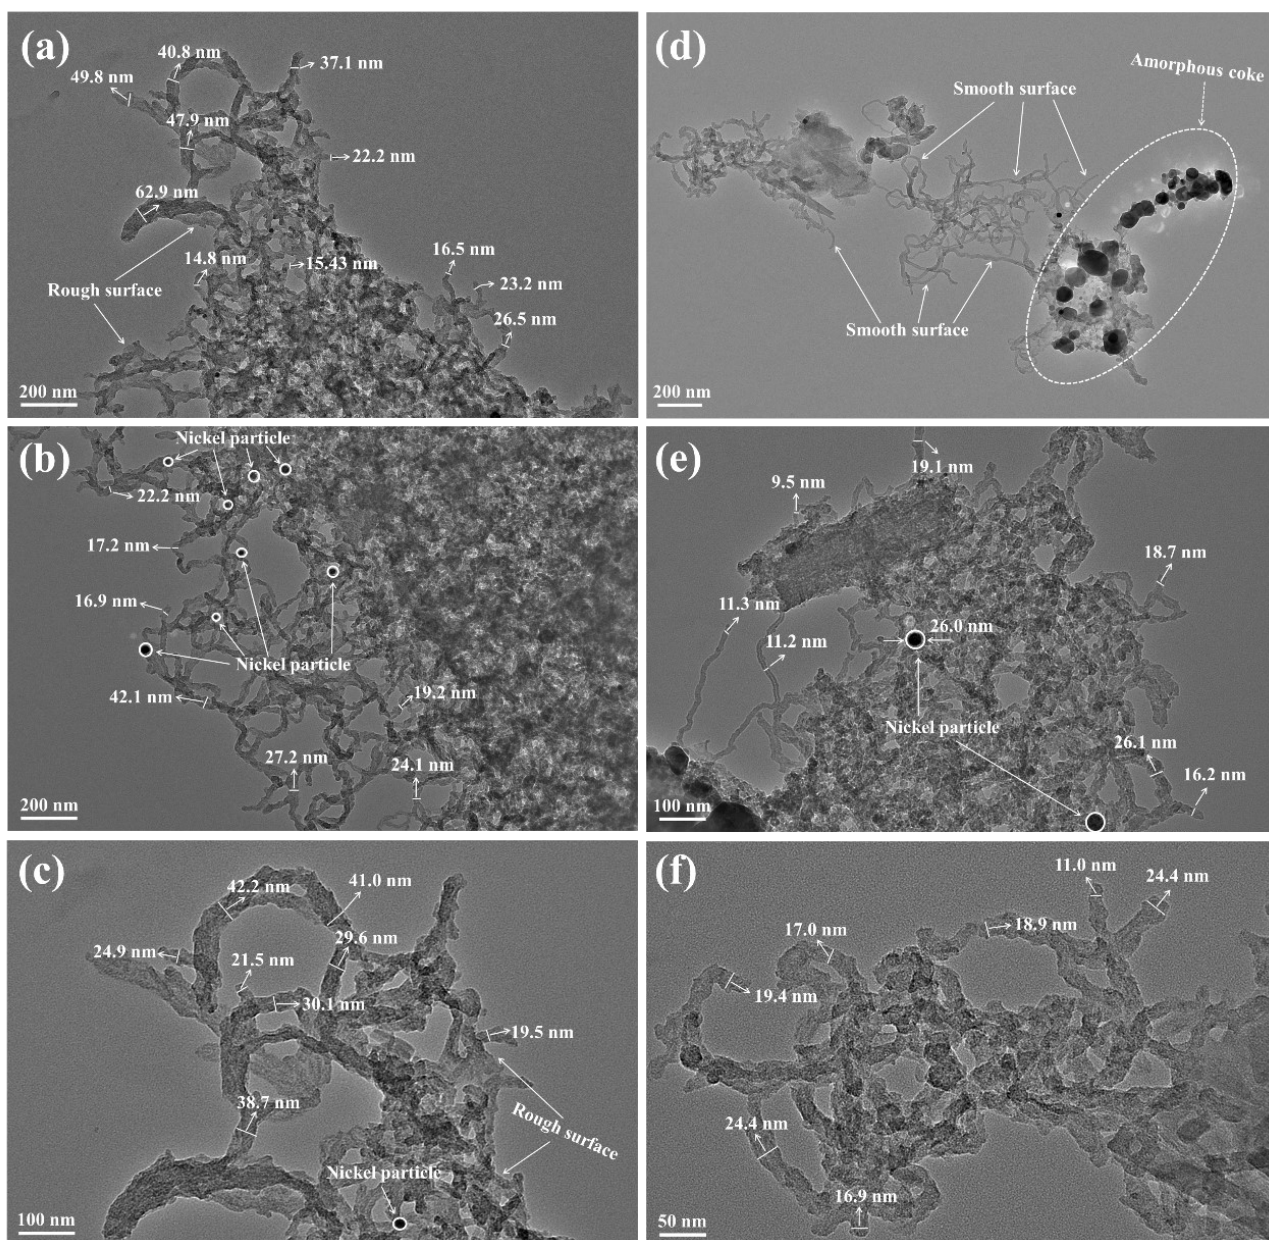

**Figure S5.** The TEM characterization of the spent catalysts after steam reforming of acetic acid versus the prolonged reaction time. (a-c): 5% Ni/biochar; (d-f): 20% Ni/biochar.
